# Supplementary material for: Role of Gist and PHOG Features in Computer-Aided Diagnosis of Tuberculosis without Segmentation
Source: PLoS One. 2014 Nov 12;9(11):e112980. doi: 10.1371/journal.pone.0112980 (PMC4229306; doi:10.1371/journal.pone.0112980)
Supplement: Table S1 — Various grey-level co-occurrence matrix (GLCM) textural features used for the classification. (DOCX) [file pone.0112980.s001.docx]

| S. No. | Textural Feature | Function |
| --- | --- | --- |
| 1. | Contrast |  |
| 2. | Correlation |  |
| 3. | Sum of Squares |  |
| 4. | Inverse Difference moment |  |
| 5. | Sum Average |  |
| 6. | Sum Variance |  |
| 7. | Sum Entropy |  |
| 8. | Entropy |  |
| 9. | Difference Variance |  |
| 10. | Difference Entropy |  |
| 11. | Info. Measure of Correlation 1 |  |
| 12. | Info. Measure of Correlation 2 |  |
| 13. | Max. Correlation Coefficient | Square root of the second largest eigenvalue of Q, where Q(i,j)= |
| 14. | Inertia |  |
| 15. | Cluster Shade |  |
| 16. | Cluster Prominence |  |

Where, ng refers to the number of grey levels in the image. i and j refer to pixel values. µx &µy andσx & σy are the means and standard deviations of partial probability density functions px and py. x and y are the coordinates of an pixel in the matrix and px+y(i) is the combination probability of x and y. HXY=. HX and HY are the entropies of px and py, HXY1= and HXY2=.
